# Supplementary material for: Ultrafast preparation of ruthenium nanoparticle/molybdenum oxide/nitrogen-doped carbon nanocomposites by magnetic induction heating for efficient hydrogen evolution reaction
Source: Royal Society of Chemistry journal article supplement (doi:10.1039/d4ta00884g), 2024-01-01
Supplement: d4ta00884g1.pdf [file d4ta00884g1.pdf]

Supporting Information

## **Ultrafast Preparation of Ruthenium Nanoparticle/Molybdenum Oxide/Nitrogen-Doped Carbon Nanocomposites by Magnetic Induction Heating for Efficient Hydrogen Evolution Reaction**

Bingzhe Yu,<sup>a</sup> Qiming Liu,<sup>a</sup> Dingjie Pan,<sup>a</sup> Kevin Singewald,<sup>a</sup> Davida DuBois,<sup>a</sup> John Tressel,<sup>a</sup> Bryan Hou,<sup>a</sup> Glenn L. Millhauser,<sup>a</sup> Frank Bridges,<sup>b</sup> and Shaowei Chen<sup>a,\*</sup>

<sup>a</sup> Department of Chemistry and Biochemistry, University of California, 1156 High Street, Santa Cruz, CA 95064, United States

<sup>b</sup> Department of Physics, University of California, 1156 High Street, Santa Cruz, CA 95064, United States

\* E-mail: shaowei@ucsc.edu

### **List of Contents**

- 31 figures
- 8 tables

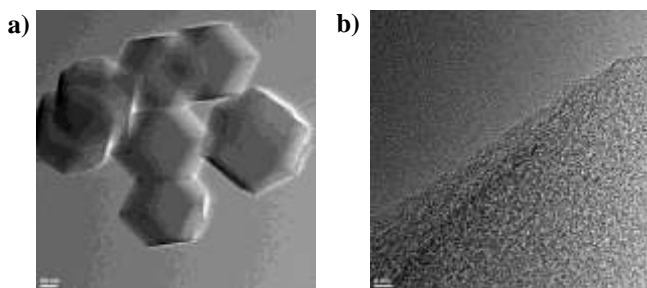

**Figure S1.** TEM images of MoO<sub>x</sub>/NC. Scale bars are (a) 50 nm and (b) 5 nm.

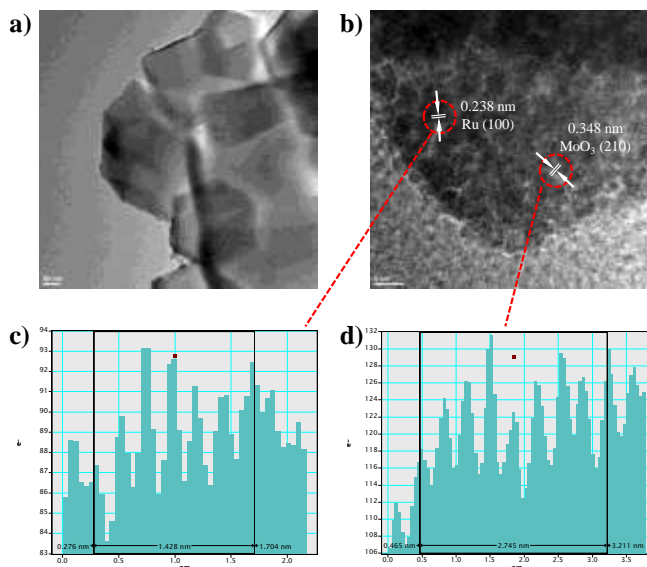

**Figure S2.** (a,b) TEM images of RuMoO<sub>x</sub>/NC-1. Scale bars are (a) 50 nm and (b) 5 nm. The interplanar spacing of the lattice fringes for (c) Ru (100) and (d) MoO<sub>3</sub> (210) of the circled areas in panel (b).

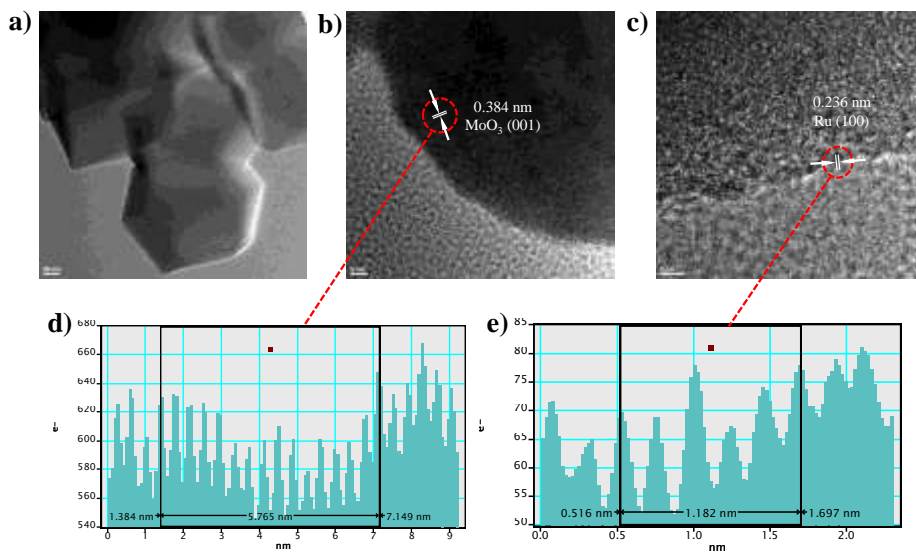

**Figure S3.** (a-c) TEM images of RuMoO<sub>x</sub>/NC-2. Scale bars are (a) 50 nm, (b) 5 nm and (c) 2 nm. The interplanar spacing of the lattice fringes for (d) MoO<sub>3</sub> (001) and (e) Ru (100) of the circled areas in panel (b) and (c), respectively.

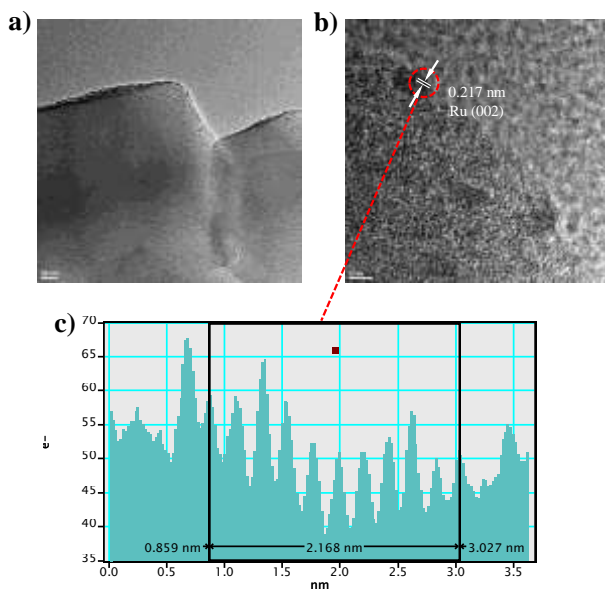

**Figure S4.** (a,b) TEM images of RuMoO<sub>x</sub>/NC-3. Scale bars are (a) 20 nm and (b) 2 nm. The interplanar spacing of the lattice fringes for (c) Ru (002) of the circled area in panel (b).

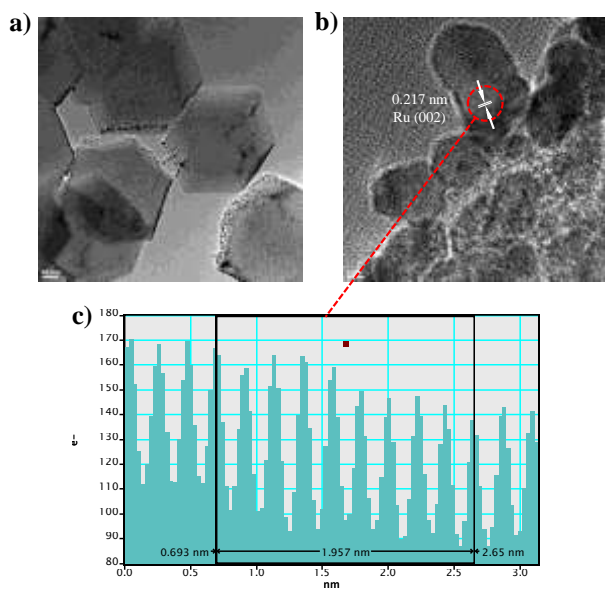

**Figure S5.** (a,b) TEM images of RuMoO<sub>x</sub>/NC-4. Scale bars are (a) 50 nm and (b) 2 nm. The interplanar spacing of the lattice fringes for (c) Ru (002) of the circled area in panel (b).

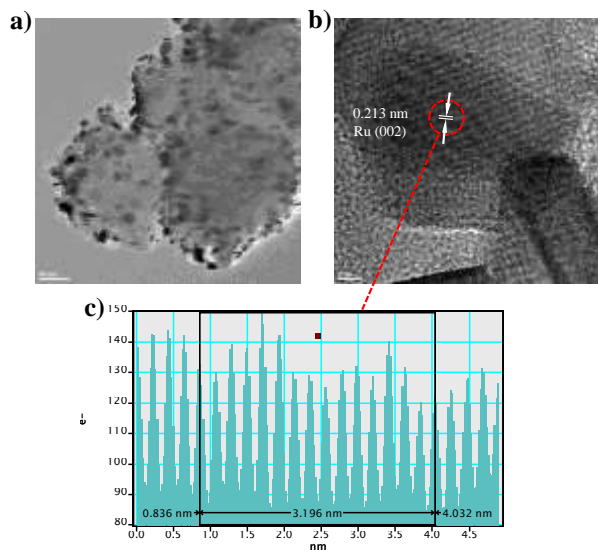

**Figure S6.** (a,b) TEM images of Ru/NC. Scale bars are (a) 50 nm and (b) 2 nm. The interplanar spacing of the lattice fringes for (c) Ru (002) of the circled area in panel (b).

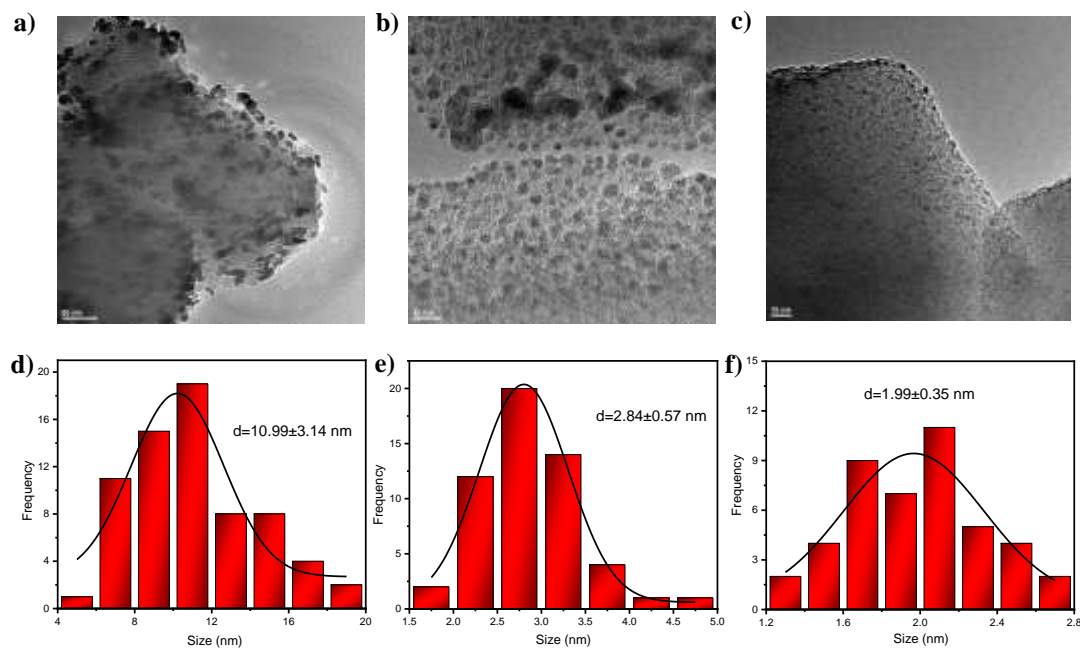

**Figure S7.** TEM images of (a) Ru/NC, (b) RuMoO<sub>x</sub>/NC-4 and (c) RuMoO<sub>x</sub>/NC-3. Scale bars are (a) 50 nm, (b) 10 nm and (c) 10 nm. (d-f) Particle size distribution histograms for (a-c), respectively.

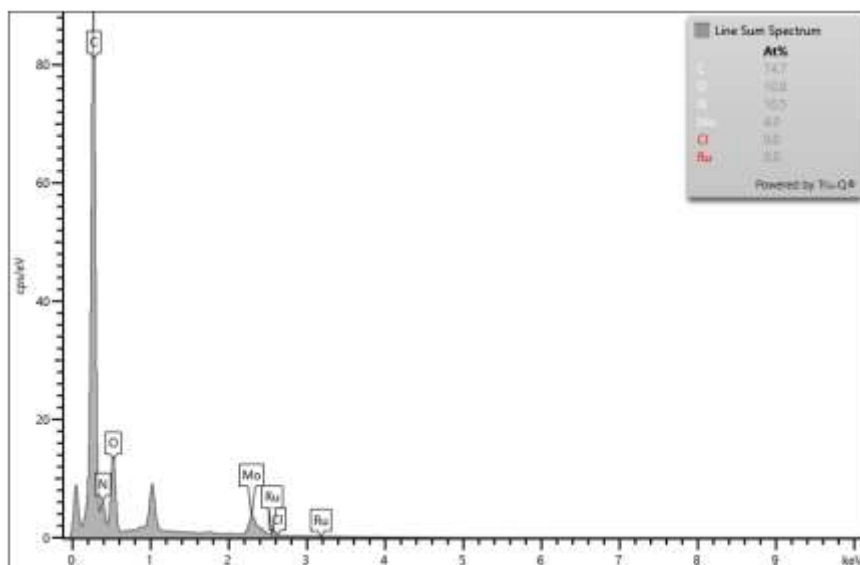

**Figure S8.** EDS plot of MoO<sub>x</sub>/NC. Inset shows the elemental composition (at%).

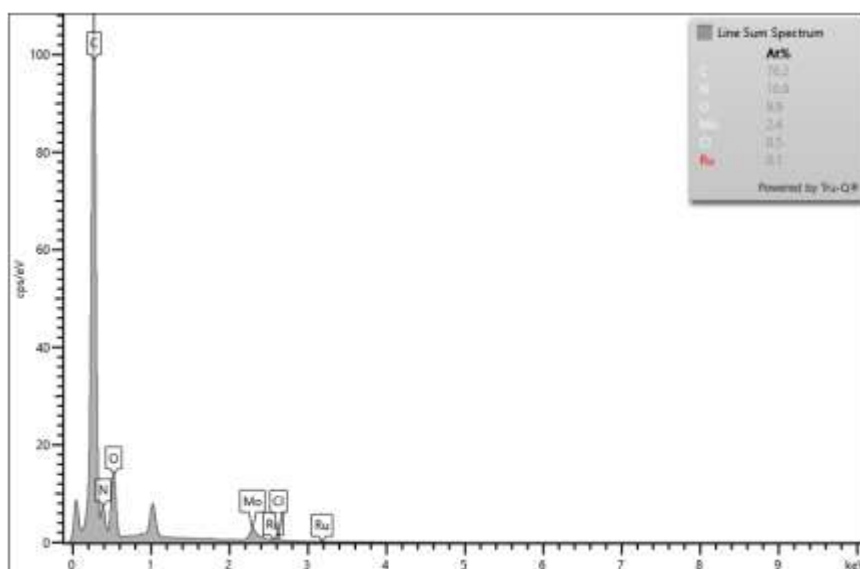

**Figure S9.** EDS plot of RuMoO<sub>x</sub>/NC-1. Inset shows the elemental composition (at%).

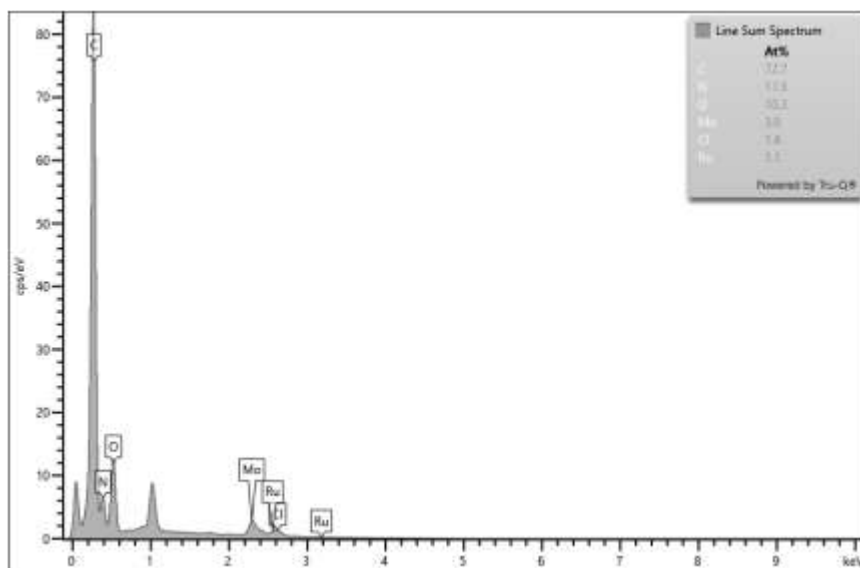

**Figure S10.** EDS plot of RuMoO<sub>x</sub>/NC-2. Inset shows the elemental composition (at%).

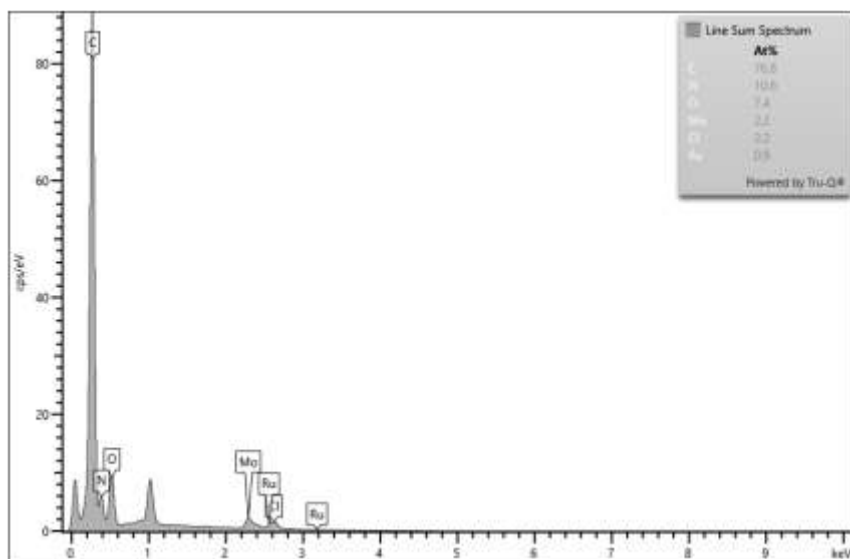

**Figure S11.** EDS plot of RuMoO<sub>x</sub>/NC-3. Inset shows the elemental composition (at%).

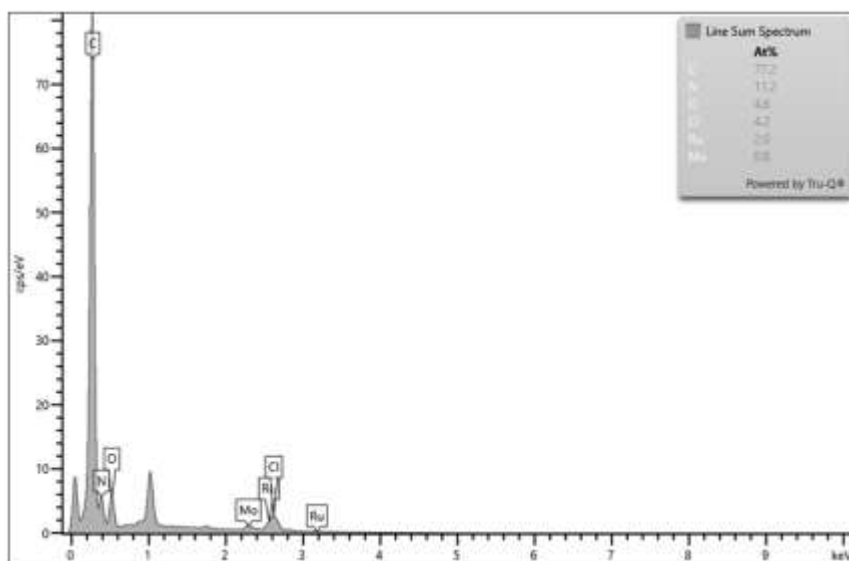

**Figure S12.** EDS plot of RuMoO<sub>x</sub>/NC-4. Inset shows the elemental composition (at%).

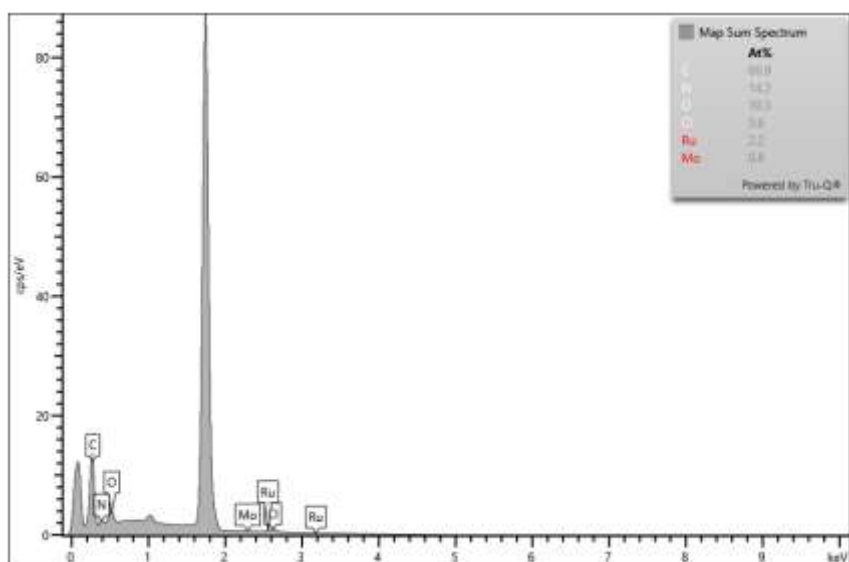

**Figure S13.** EDS plot of RuMoO<sub>x</sub>/NC-5. Inset shows the elemental composition (at%).

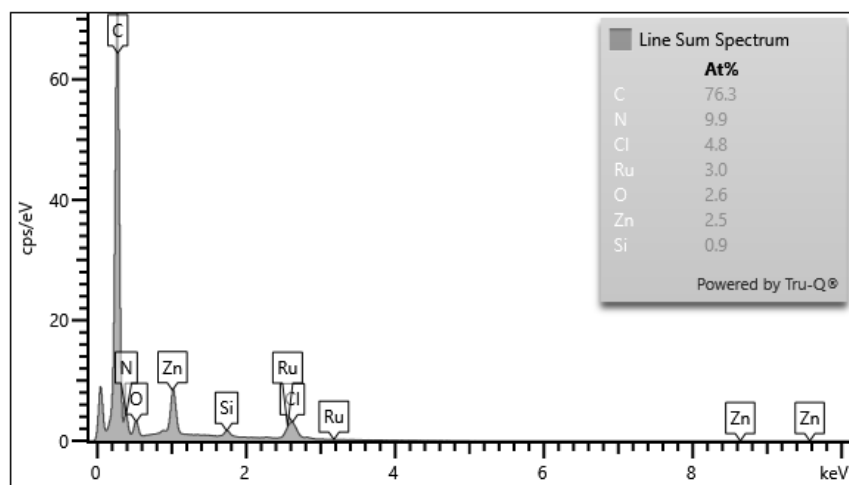

**Figure S14.** EDS plot of Ru/NC. Inset shows the elemental composition (at%).

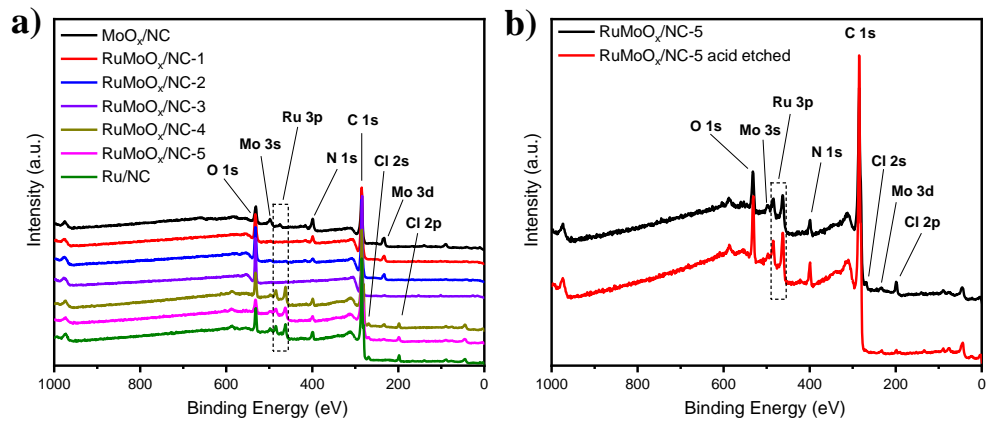

**Figure S15.** XPS survey spectra of (a) MoO<sub>x</sub>/NC, RuMoO<sub>x</sub>/NC-1, RuMoO<sub>x</sub>/NC-2, RuMoO<sub>x</sub>/NC-3, RuMoO<sub>x</sub>/NC-4, RuMoO<sub>x</sub>/NC-5 and Ru/NC; and (b) RuMoO<sub>x</sub>/NC-5 and RuMoO<sub>x</sub>/NC-5 acid etched.

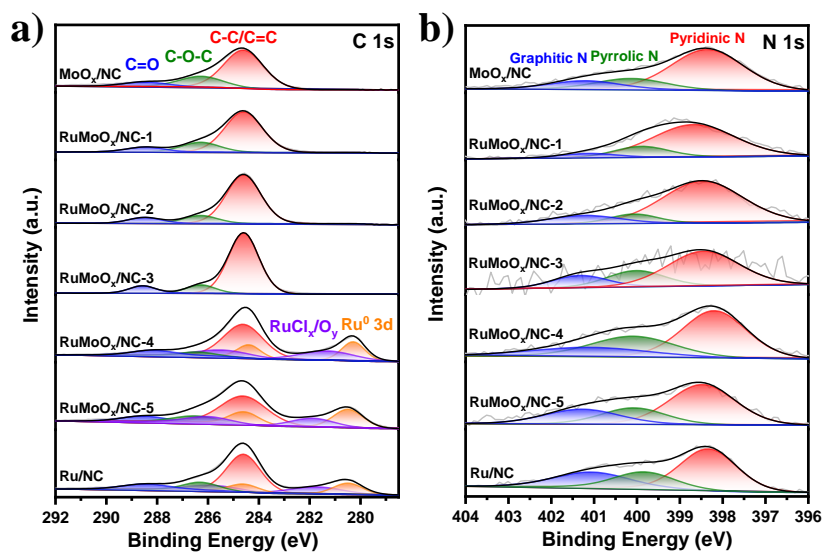

**Figure S16.** High-resolution XPS spectra of the (a) C 1s and (b) N 1s electrons of MoO<sub>x</sub>/NC, RuMoO<sub>x</sub>/NC-1, RuMoO<sub>x</sub>/NC-2, RuMoO<sub>x</sub>/NC-3, RuMoO<sub>x</sub>/NC-4, RuMoO<sub>x</sub>/NC-5 and Ru/NC.



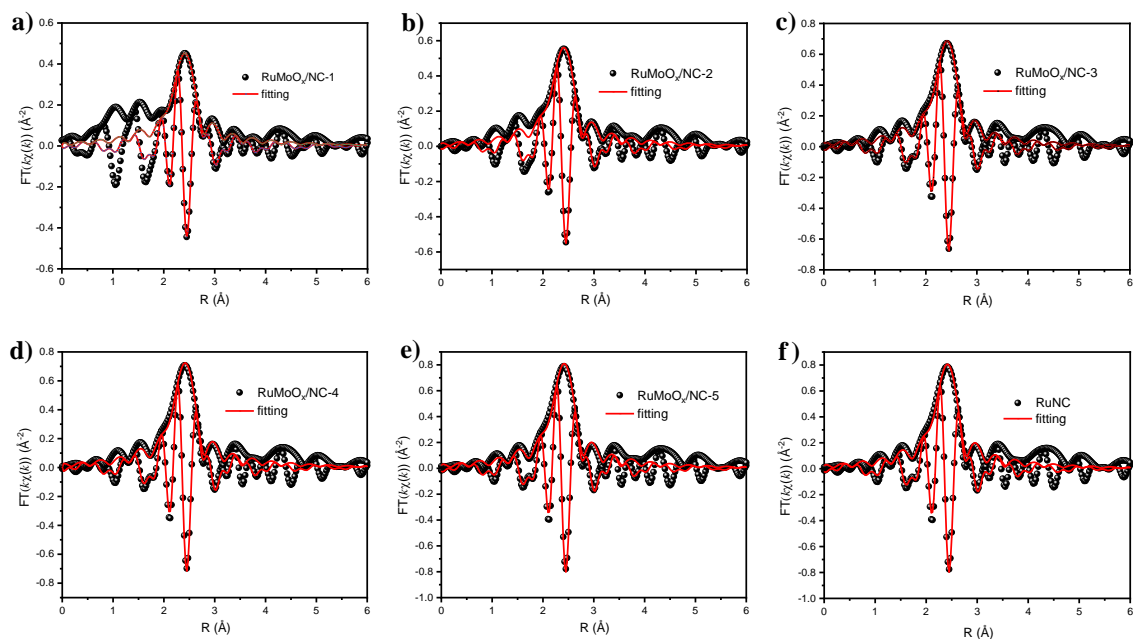

**Figure S17.** Fittings of Ru K-edge EXAFS of (a) RuMoO<sub>x</sub>/NC-1, (b) RuMoO<sub>x</sub>/NC-2, (c) RuMoO<sub>x</sub>/NC-3, (d) RuMoO<sub>x</sub>/NC-4, (e) RuMoO<sub>x</sub>/NC-5, and (f) Ru/NC. Fit range is 2.0-2.8 Å.

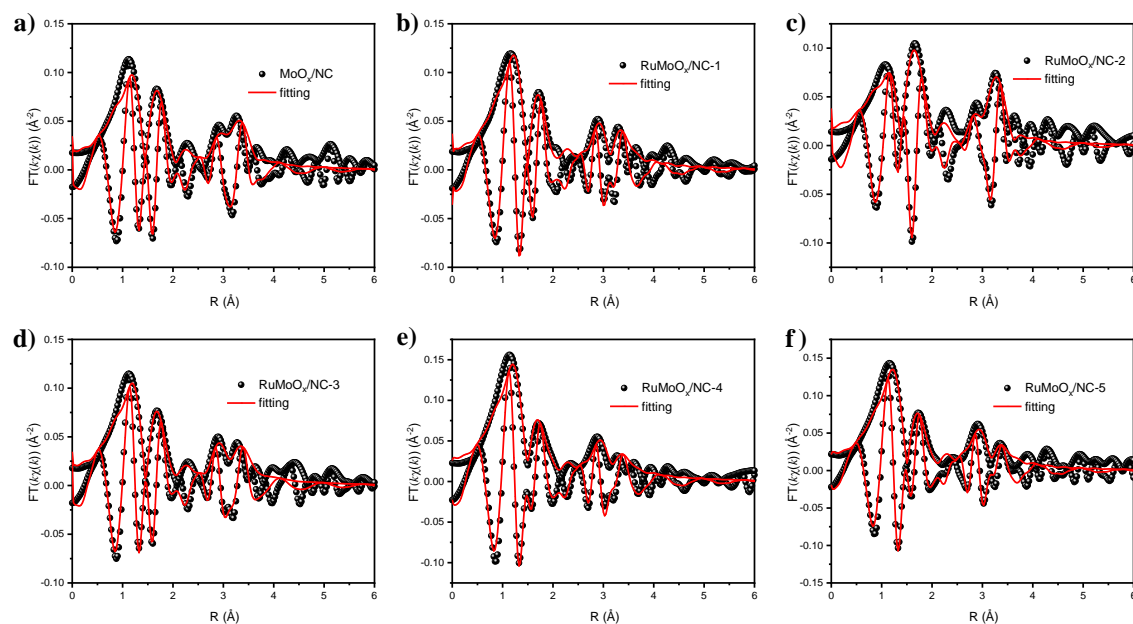

**Figure S18.** Fittings of Mo K-edge EXAFS of (a) MoO<sub>x</sub>/NC, (b) RuMoO<sub>x</sub>/NC-1, (c) RuMoO<sub>x</sub>/NC-2, (d) RuMoO<sub>x</sub>/NC-3, (e) RuMoO<sub>x</sub>/NC-4, and (f) RuMoO<sub>x</sub>/NC-5. Fit range is 0.8-3.5 Å.

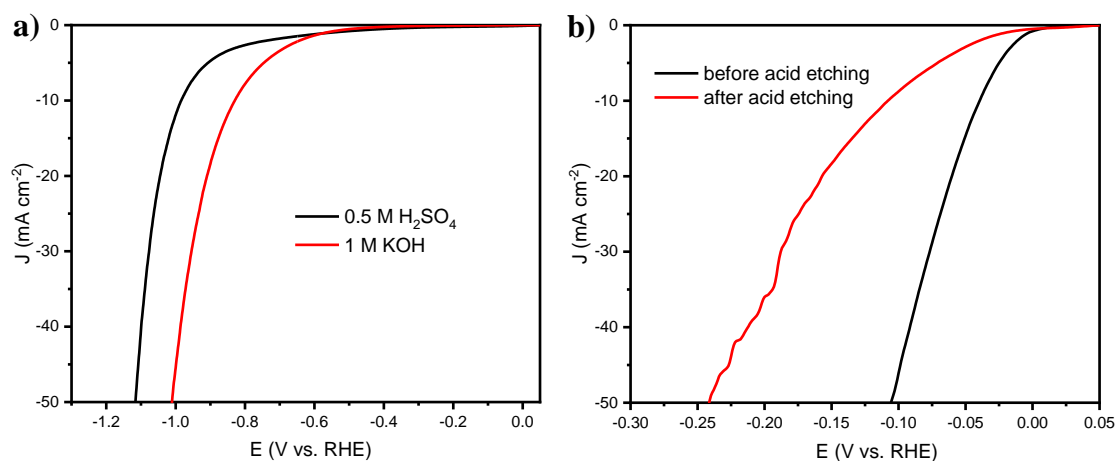

**Figure S19.** (a) HER polarization curves of NC in 0.5 M H<sub>2</sub>SO<sub>4</sub> and 1 M KOH. (b) HER polarization curves of RuMoO<sub>x</sub>/NC-5 in 1 M KOH before and after treatment in a 4 M H<sub>3</sub>PO<sub>4</sub> solution.

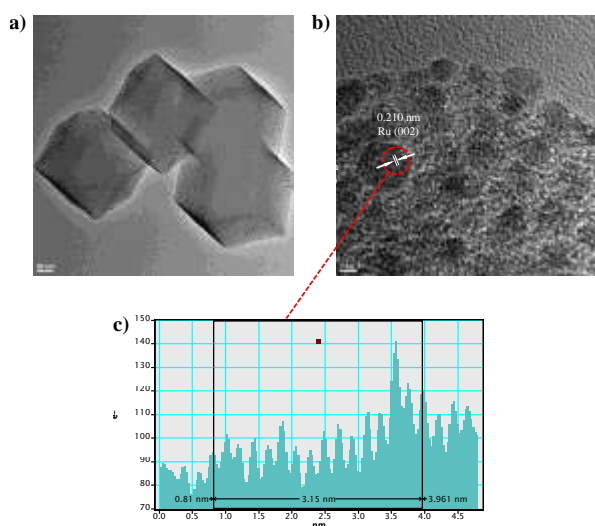

**Figure S20.** (a,b) TEM images of RuMoO<sub>x</sub>/NC-5 after acid etching. Scale bars are (a) 50 nm and (b) 2 nm. The interplanar spacing of the lattice fringes for (c) Ru (002) of the circled area in panel (b).

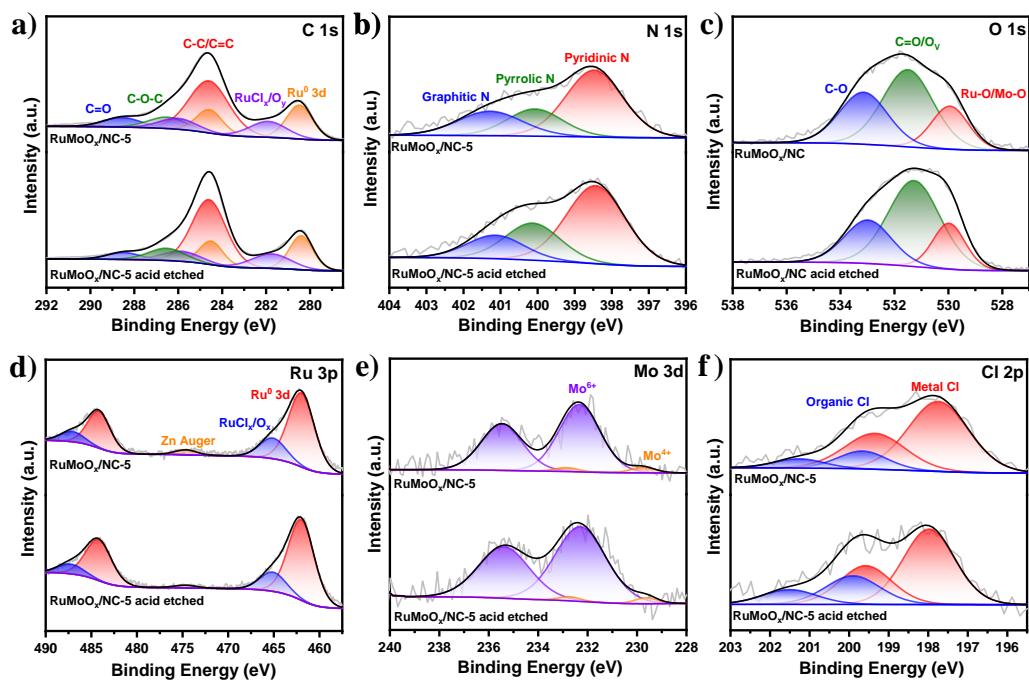

**Figure S21.** High-resolution XPS spectra of (a) C 1s, (b) N 1s, (c) O 1s, (d) Ru 3p, (e) Mo 3d, and (f) Cl 2p for RuMoO<sub>x</sub>/NC-5 and RuMoO<sub>x</sub>/NC-5 acid etched.

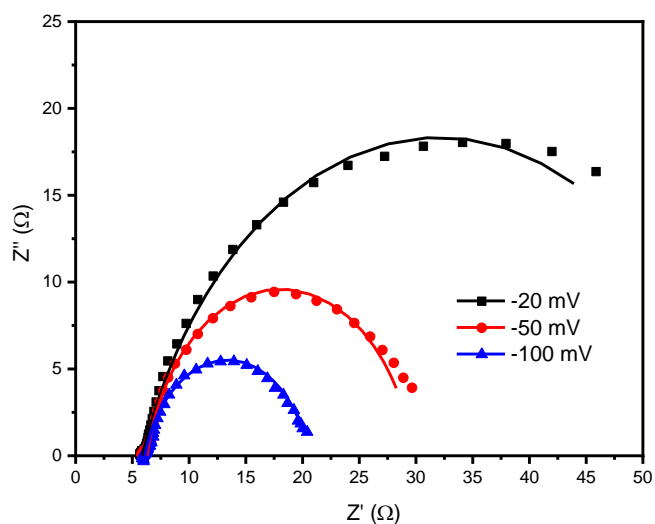

**Figure S22.** Nyquist plots of RuMoO<sub>x</sub>/NC-5 at the overpotential of -20 mV, -50 mV and -100 mV in 1 M KOH.

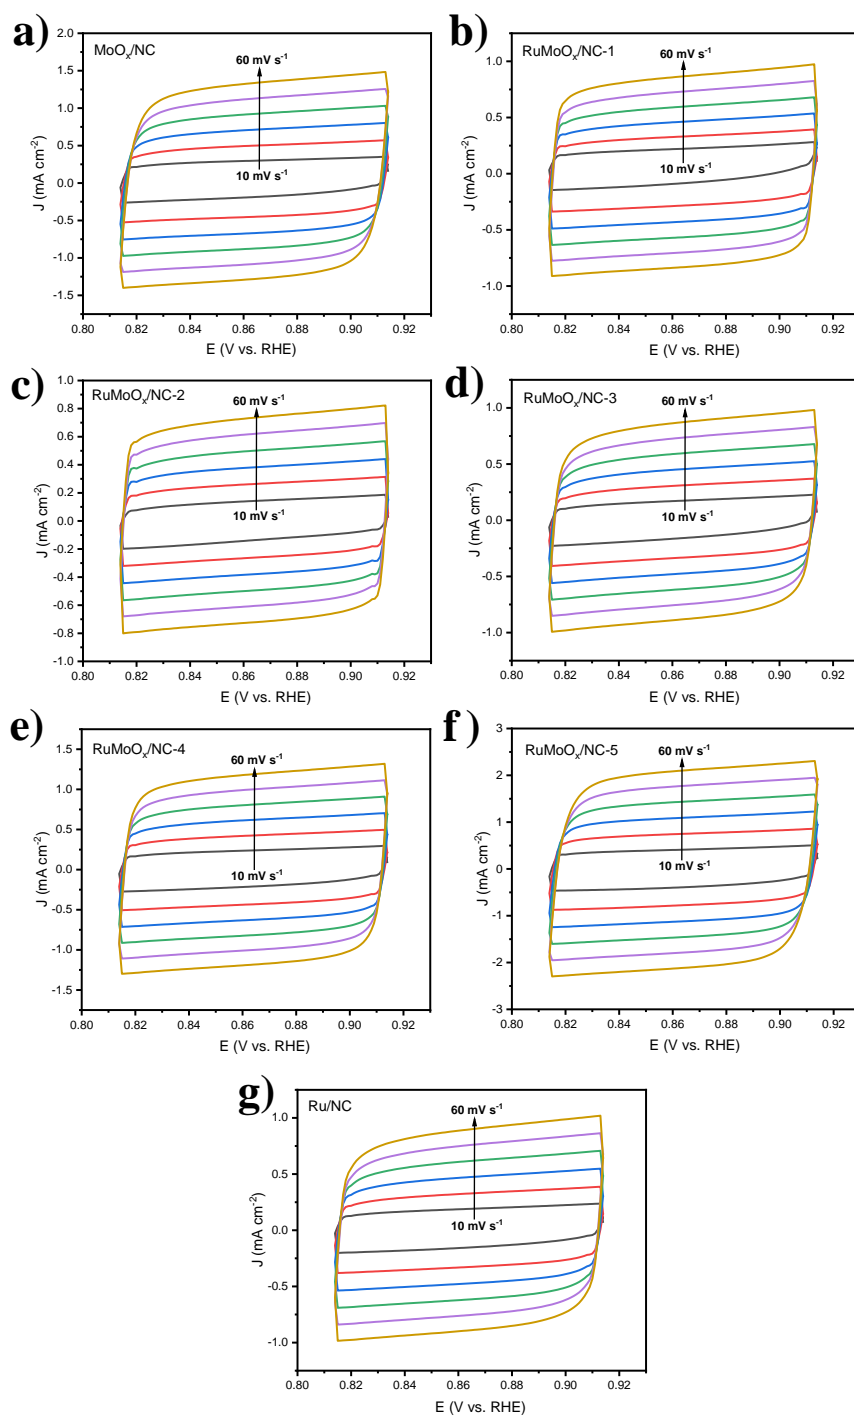

**Figure S23.** Cyclic Voltammograms of (a)  $\text{MoO}_x/\text{NC}$ , (b)  $\text{RuMoO}_x/\text{NC-1}$ , (c)  $\text{RuMoO}_x/\text{NC-2}$ , (d)  $\text{RuMoO}_x/\text{NC-3}$ , (e)  $\text{RuMoO}_x/\text{NC-4}$ , (f)  $\text{RuMoO}_x/\text{NC-5}$ , and (g)  $\text{Ru}/\text{NC}$  within the range of +0.814 to +0.914 V at various scan rates in 1 M KOH.

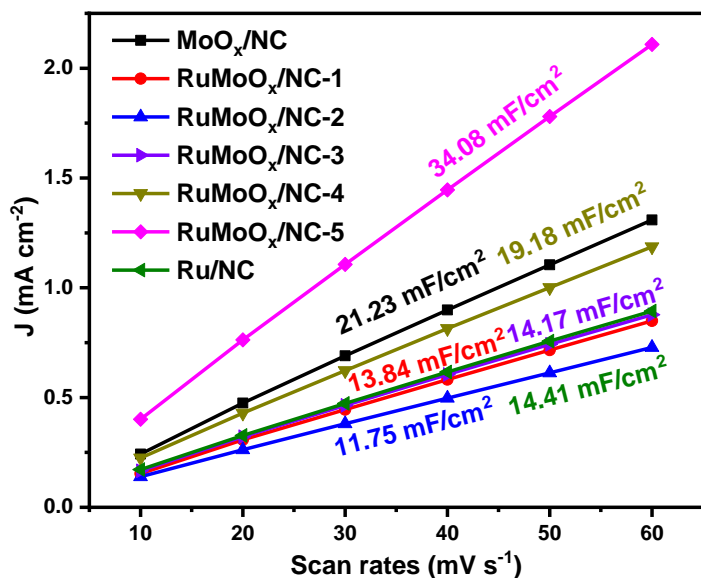

**Figure S24.** Variation of the double-layer charging current at +0.864 V with scan rate of MoO<sub>x</sub>/NC, RuMoO<sub>x</sub>/NC-1, RuMoO<sub>x</sub>/NC-2, RuMoO<sub>x</sub>/NC-3, RuMoO<sub>x</sub>/NC-4, RuMoO<sub>x</sub>/NC-5, Ru/NC and 20 wt% Pt/C in 1 M KOH, from which the double-layer capacitance ( $C_{dl}$ ) is estimated.

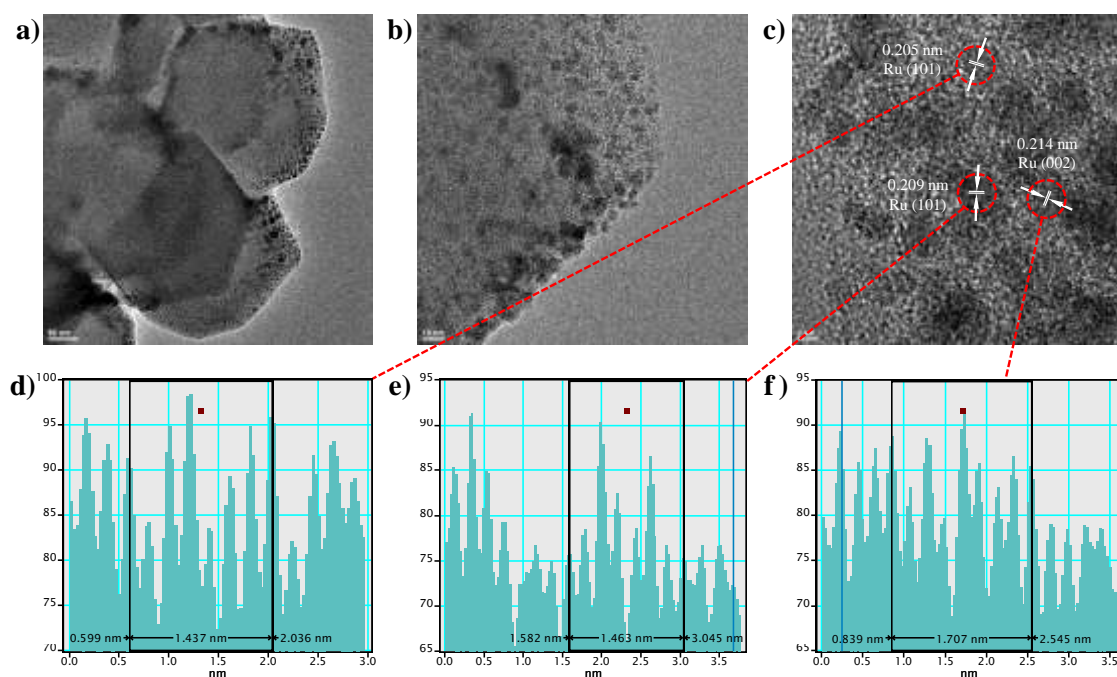

**Figure S25.** (a,b,c) TEM images of RuMoO<sub>x</sub>/NC-5 after 5000 CV cycles. Scale bars are (a) 50 nm, (b) 10 nm and (c) 2 nm. The interplanar spacing of the lattice fringes of the circled areas in panel (c) are shown in panels (d,e) Ru (101) and (f) Ru (002).

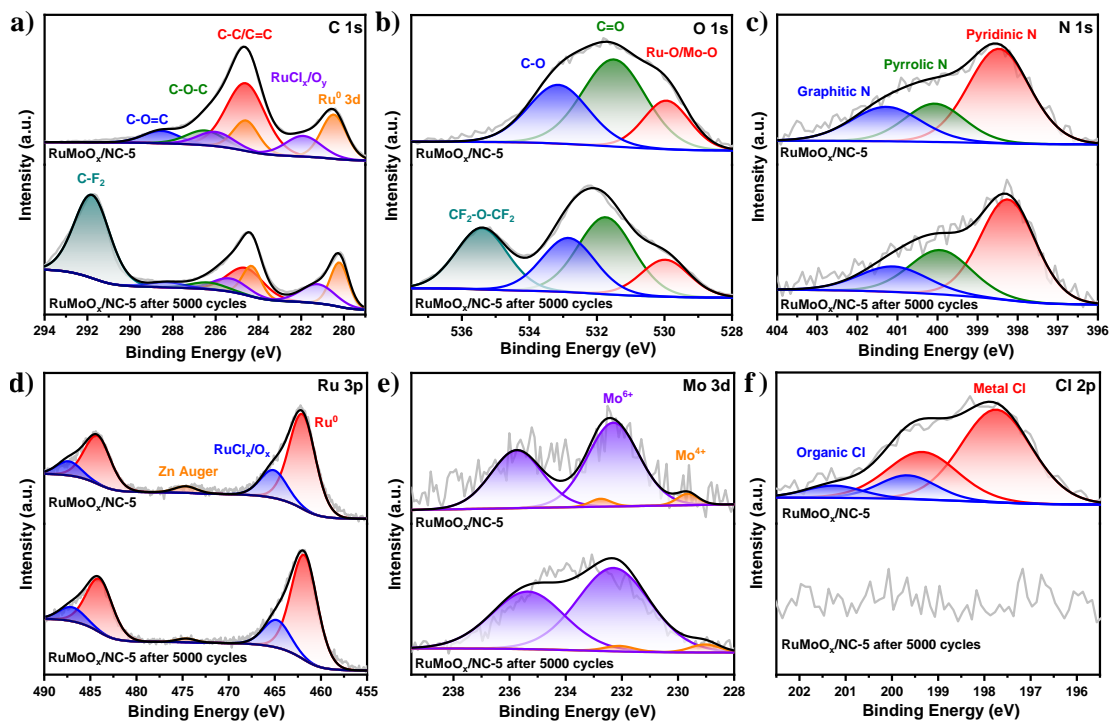

**Figure S26.** High-resolution XPS scans of (a) the C 1s, (b) O 1s, (c) N 1s, (d) Ru 3p, (e) Mo 3d, and (f) Cl 2p electrods for RuMoO<sub>x</sub>/NC-5 and RuMoO<sub>x</sub>/NC-5 after 5000 CV cycles.

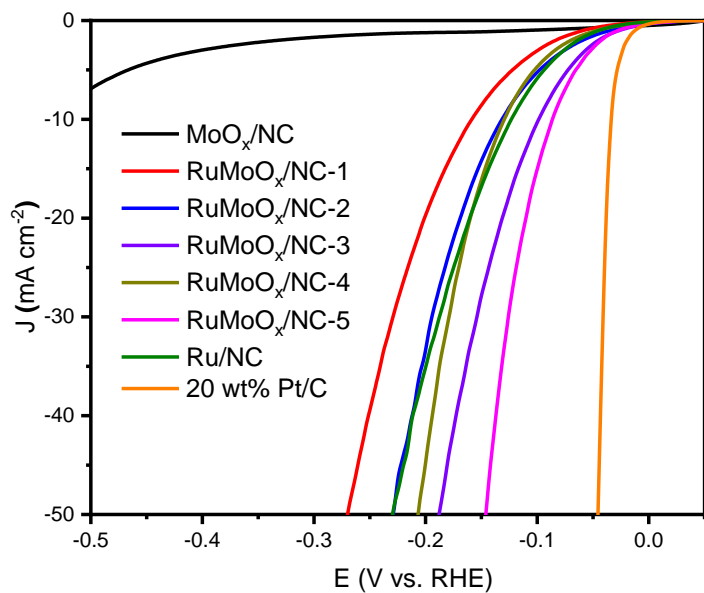

**Figure S27.** HER polarization curves in 0.5 M H<sub>2</sub>SO<sub>4</sub> of MoO<sub>x</sub>/NC, RuMoO<sub>x</sub>/NC-1, RuMoO<sub>x</sub>/NC-2, RuMoO<sub>x</sub>/NC-3, RuMoO<sub>x</sub>/NC-4, RuMoO<sub>x</sub>/NC-5, Ru/NC and 20 wt% Pt/C.

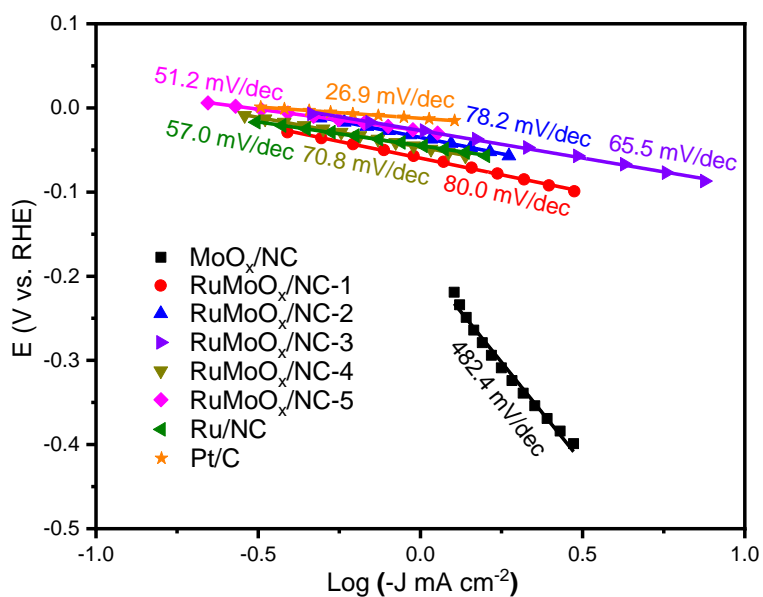

**Figure S28.** Tafel plots of MoO<sub>x</sub>/NC, RuMoO<sub>x</sub>/NC-1, RuMoO<sub>x</sub>/NC-2, RuMoO<sub>x</sub>/NC-3, RuMoO<sub>x</sub>/NC-4, RuMoO<sub>x</sub>/NC-5, Ru/NC and 20 wt% Pt/C in 0.5 M H<sub>2</sub>SO<sub>4</sub>.

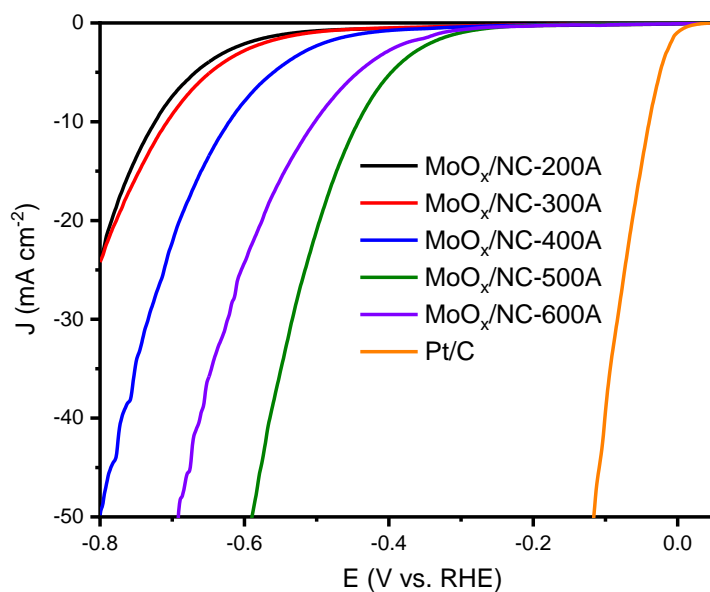

**Figure S29.** HER polarization curves of MoO<sub>x</sub>/NC composites prepared by MIH at currents varied from 200 A to 600 A for 10 s (i.e., MoO<sub>x</sub>/NC-200A, MoO<sub>x</sub>/NC-300A, MoO<sub>x</sub>/NC-400A, MoO<sub>x</sub>/NC-500A, MoO<sub>x</sub>/NC-600A) and 20 wt% Pt/C in 1 M KOH.

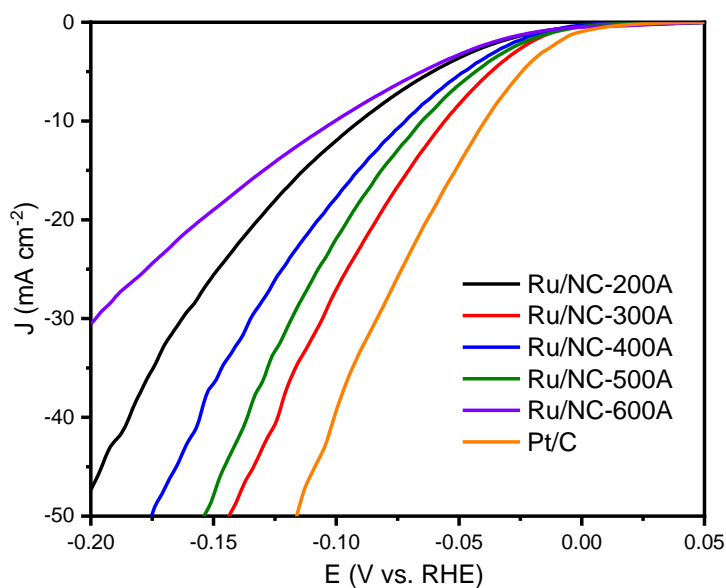

**Figure S30.** HER polarization curves of Ru/NC composites prepared by MIH at currents varied from 200 A to 600 A for 10 s (i.e., Ru/NC-200A, Ru/NC-300A, Ru/NC-400A, Ru/NC-500A, Ru/NC-600A) and 20 wt% Pt/C in 1 M KOH.

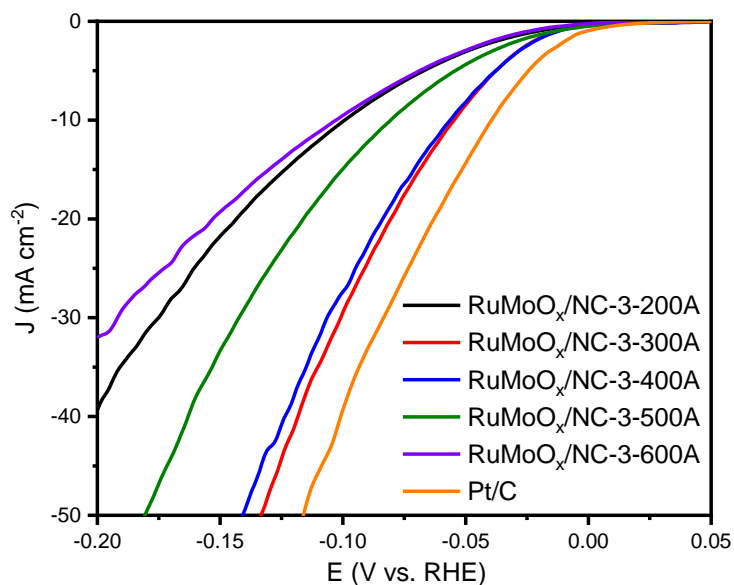

**Figure S31.** HER polarization curves of RuMoO<sub>x</sub>/NC composites prepared by MIH at currents varied from 200 to 600 A for 10 s (i.e., RuMoO<sub>x</sub>/NC-3-200A, RuMoO<sub>x</sub>/NC-3-300A, RuMoO<sub>x</sub>/NC-3-400A, RuMoO<sub>x</sub>/NC-3-500A, RuMoO<sub>x</sub>/NC-3-600A) and 20 wt% Pt/C in 1 M KOH.



**Table S1.** Elemental composition (at%) of various samples obtained from SEM elemental mapping.

| <b>Sample</b>            | <b>C</b> | <b>O</b> | <b>N</b> | <b>Cl</b> | <b>Ru</b> | <b>Mo</b> | <b>Ru+Mo</b> |
|--------------------------|----------|----------|----------|-----------|-----------|-----------|--------------|
| MoO <sub>x</sub> /NC     | 74.7     | 10.8     | 10.5     | /         | /         | 4.0       | 4.0          |
| RuMoO <sub>x</sub> /NC-1 | 76.2     | 9.9      | 10.9     | 0.5       | 0.1       | 2.4       | 2.5          |
| RuMoO <sub>x</sub> /NC-2 | 72.7     | 10.3     | 11.5     | 1.4       | 1.1       | 3.0       | 4.1          |
| RuMoO <sub>x</sub> /NC-3 | 76.8     | 7.4      | 10.6     | 2.2       | 0.9       | 2.2       | 3.1          |
| RuMoO <sub>x</sub> /NC-4 | 77.2     | 4.6      | 11.2     | 4.2       | 2.0       | 0.8       | 2.8          |
| RuMoO <sub>x</sub> /NC-5 | 66.9     | 10.3     | 14.2     | 5.6       | 2.2       | 0.8       | 3.0          |
| Ru/NC                    | 79.0     | 2.7      | 10.2     | 5.0       | 3.1       | /         | 3.1          |

**Table S2.** Elemental composition (at%) of various samples obtained from XPS measurements.

| <b>Sample</b>                                  | <b>C</b> | <b>O</b> | <b>N</b> | <b>Cl</b> | <b>Ru</b> | <b>Mo</b> | <b>Ru+Mo</b> |
|------------------------------------------------|----------|----------|----------|-----------|-----------|-----------|--------------|
| MoO <sub>x</sub> /NC                           | 77.8     | 10.67    | 9.97     | /         | /         | 1.55      | 1.55         |
| RuMoO <sub>x</sub> /NC-1                       | 81.81    | 13.15    | 4.07     | /         | 0.21      | 0.76      | 0.97         |
| RuMoO <sub>x</sub> /NC-2                       | 81.69    | 14.96    | 2.28     | 0.14      | 0.24      | 0.68      | 0.92         |
| RuMoO <sub>x</sub> /NC-3                       | 83.75    | 15.23    | 0.65     | 0.10      | 0.15      | 0.12      | 0.27         |
| RuMoO <sub>x</sub> /NC-4                       | 75.04    | 13.39    | 5.77     | 2.13      | 3.26      | 0.42      | 3.68         |
| RuMoO <sub>x</sub> /NC-5                       | 76.45    | 11.31    | 5.67     | 2.92      | 3.31      | 0.34      | 3.65         |
| RuMoO <sub>x</sub> /NC-5<br>etched             | 77.83    | 11.98    | 6.22     | 0.63      | 3.18      | 0.17      | 3.35         |
| RuMoO <sub>x</sub> /NC-5<br>after CV<br>cycles | 73.02    | 21.63    | 2.45     | /         | 2.45      | 0.45      | 2.90         |
| Ru/NC                                          | 76.55    | 12.15    | 6.36     | 2.53      | 2.41      | /         | 2.41         |

From Table S1, the N contents as evaluated by EDS are very consistent between 10-14 at% among the samples, while in Table S2 (by XPS measurements), the N contents are rather scattered. The discrepancy likely arises from their different probe depth. Results from EDS measurements mostly reflect the material bulk property, whereas XPS is in essence a surface analysis technique.

**Table S3.** Elemental composition (wt%) of various samples obtained from XPS measurements.

| Sample                                         | C     | O     | N     | Cl   | Ru    | Mo    |
|------------------------------------------------|-------|-------|-------|------|-------|-------|
| MoO <sub>x</sub> /NC                           | 67.05 | 12.25 | 10.02 | /    | /     | 10.67 |
| RuMoO <sub>x</sub> /NC-1                       | 73.19 | 15.68 | 4.26  | /    | 1.58  | 5.29  |
| RuMoO <sub>x</sub> /NC-2                       | 72.74 | 17.75 | 2.37  | 0.37 | 1.65  | 5.12  |
| RuMoO <sub>x</sub> /NC-3                       | 78.22 | 18.95 | 0.71  | 0.28 | 1.10  | 0.75  |
| RuMoO <sub>x</sub> /NC-4                       | 54.90 | 13.05 | 4.92  | 4.60 | 20.08 | 2.46  |
| RuMoO <sub>x</sub> /NC-5                       | 55.45 | 10.93 | 4.80  | 6.25 | 20.77 | 1.80  |
| RuMoO <sub>x</sub> /NC-5<br>etched             | 59.28 | 12.15 | 5.53  | 1.42 | 20.59 | 1.04  |
| RuMoO <sub>x</sub> /NC-5<br>after CV<br>cycles | 56.64 | 22.35 | 2.22  | /    | 16.00 | 2.79  |
| Ru/NC                                          | 59.40 | 12.55 | 5.76  | 5.80 | 16.48 | /     |

**Table S4.** Ru 3p binding energies in the series of samples as determined by XPS measurements.

| Sample                                      | Ru <sup>0</sup> (eV) |        | Ru <sup>δ+</sup> (eV) |        | Zn Auger |
|---------------------------------------------|----------------------|--------|-----------------------|--------|----------|
| RuMoO <sub>x</sub> /NC-1                    | 462.19               | 484.39 | 465.23                | 487.43 | 474.54   |
| RuMoO <sub>x</sub> /NC-2                    | 462.16               | 484.36 | 465.21                | 487.41 | 474.91   |
| RuMoO <sub>x</sub> /NC-3                    | 462.08               | 484.28 | 465.18                | 487.38 | 474.74   |
| RuMoO <sub>x</sub> /NC-4                    | 462.04               | 484.24 | 465.16                | 487.36 | 474.56   |
| RuMoO <sub>x</sub> /NC-5                    | 462.02               | 484.22 | 465.14                | 487.34 | 474.65   |
| RuMoO <sub>x</sub> /NC-5<br>etched          | 461.99               | 484.19 | 465.09                | 487.29 | 474.66   |
| RuMoO <sub>x</sub> /NC-5<br>after CV cycles | 461.80               | 484.00 | 464.79                | 486.99 | 474.60   |
| Ru/NC                                       | 462.01               | 484.21 | 465.12                | 487.32 | 474.75   |

**Table S5.** Mo 3d binding energies in the series of sample as determined by XPS measurements.

| <b>Sample</b>                               | <b>Mo<sup>4+</sup> (eV)</b> |        | <b>Mo<sup>6+</sup> (eV)</b> |        |
|---------------------------------------------|-----------------------------|--------|-----------------------------|--------|
| MoO <sub>x</sub> /NC                        | 229.21                      | 232.31 | 232.19                      | 235.29 |
| RuMoO <sub>x</sub> /NC-1                    | 229.50                      | 232.60 | 232.21                      | 235.31 |
| RuMoO <sub>x</sub> /NC-2                    | 229.40                      | 233.50 | 232.24                      | 235.34 |
| RuMoO <sub>x</sub> /NC-3                    | 229.56                      | 232.66 | 232.25                      | 235.35 |
| RuMoO <sub>x</sub> /NC-4                    | 229.75                      | 232.85 | 232.26                      | 235.36 |
| RuMoO <sub>x</sub> /NC-5                    | 229.56                      | 232.66 | 232.33                      | 235.43 |
| RuMoO <sub>x</sub> /NC-5<br>after CV cycles | 229.03                      | 232.08 | 232.31                      | 235.35 |
| RuMoO <sub>x</sub> /NC-5<br>etched          | 229.63                      | 232.73 | 232.29                      | 235.39 |

**Table S6.** Fitting results of the EXAFS spectra for the series of samples.

| Sample                                                                              | Peak  | $\sigma^2$ (Å <sup>2</sup> ) | Distance (Å) | Coordination number |
|-------------------------------------------------------------------------------------|-------|------------------------------|--------------|---------------------|
| MoO <sub>x</sub> /NC<br>(73.93% MoO <sub>3</sub> ,<br>26.07% MoO <sub>2</sub> )     | Mo-O  | 0.0016                       | 1.70         | 1.5                 |
|                                                                                     | Mo-O  | 0.0104                       | 1.95         | 3.0                 |
|                                                                                     | Mo-O  | 0.0016                       | 2.30         | 1.5                 |
|                                                                                     | Mo-Mo | 0.0069                       | 3.26         | 1.0                 |
|                                                                                     | Mo-Mo | 0.0098                       | 3.74         | 3.0                 |
| RuMoO <sub>x</sub> /NC-1<br>(84.74% MoO <sub>3</sub> ,<br>15.26% MoO <sub>2</sub> ) | Mo-O  | 0.0021                       | 1.71         | 1.7                 |
|                                                                                     | Mo-O  | 0.0077                       | 1.96         | 2.6                 |
|                                                                                     | Mo-O  | 0.0037                       | 2.28         | 1.7                 |
|                                                                                     | Ru-Ru | 0.0019                       | 2.68         | 5.1                 |
|                                                                                     | Mo-Mo | 0.0019                       | 3.24         | 0.6                 |
|                                                                                     | Mo-Mo | 0.0140                       | 3.75         | 3.4                 |
| RuMoO <sub>x</sub> /NC-2<br>(84.74% MoO <sub>3</sub> ,<br>15.26% MoO <sub>2</sub> ) | Mo-O  | 0.0017                       | 1.70         | 1.4                 |
|                                                                                     | Mo-O  | 0.0085                       | 1.96         | 3.2                 |
|                                                                                     | Mo-O  | 0.0016                       | 2.31         | 1.4                 |
|                                                                                     | Ru-Ru | 0.0016                       | 2.67         | 6.2                 |
|                                                                                     | Mo-Mo | 0.0100                       | 3.21         | 1.2                 |
|                                                                                     | Mo-Mo | 0.0066                       | 3.71         | 2.8                 |
| RuMoO <sub>x</sub> /NC-3<br>(74.80% MoO <sub>3</sub> ,<br>25.20% MoO <sub>2</sub> ) | Mo-O  | 0.0016                       | 1.70         | 1.5                 |
|                                                                                     | Mo-O  | 0.0118                       | 1.95         | 3.0                 |
|                                                                                     | Mo-O  | 0.0023                       | 2.29         | 1.5                 |
|                                                                                     | Ru-Ru | 0.0016                       | 2.68         | 7.6                 |
|                                                                                     | Mo-Mo | 0.0056                       | 3.24         | 1.0                 |
|                                                                                     | Mo-Mo | 0.0128                       | 3.76         | 3.0                 |
| RuMoO <sub>x</sub> /NC-4<br>(77.12% MoO <sub>3</sub> ,<br>22.88% MoO <sub>2</sub> ) | Mo-O  | 0.0016                       | 1.69         | 1.5                 |
|                                                                                     | Mo-O  | 0.0177                       | 1.93         | 2.9                 |
|                                                                                     | Mo-O  | 0.0036                       | 2.29         | 1.5                 |
|                                                                                     | Ru-Ru | 0.0016                       | 2.68         | 8.0                 |
|                                                                                     | Mo-Mo | 0.0036                       | 3.25         | 0.9                 |
|                                                                                     | Mo-Mo | 0.0164                       | 3.76         | 3.1                 |
| RuMoO <sub>x</sub> /NC-5<br>(80.51% MoO <sub>3</sub> ,<br>19.49% MoO <sub>2</sub> ) | Mo-O  | 0.0016                       | 1.70         | 1.6                 |
|                                                                                     | Mo-O  | 0.0165                       | 1.96         | 2.8                 |
|                                                                                     | Mo-O  | 0.0017                       | 2.29         | 1.6                 |
|                                                                                     | Ru-Ru | 0.0016:                      | 2.68         | 8.9                 |
|                                                                                     | Mo-Mo | 0.0026                       | 3.25         | 0.8                 |
|                                                                                     | Mo-Mo | 0.0167                       | 3.76         | 3.2                 |
| Ru/NC                                                                               | Ru-Ru | 0.0016                       | 2.68         | 8.9                 |

Note: The minimum limit for  $\sigma$  is set at 0.04, as only strong bonds can exhibit values smaller than this threshold.

**Table S7.** Comparison of HER activity in 1M KOH between RuMoO<sub>x</sub>/NC-5 and other Ru-based HER electrocatalysts.

| Electrocatalyst                                          | $\eta_{10}$ (mV) | Tafel slope (mV dec <sup>-1</sup> ) | Reference        |
|----------------------------------------------------------|------------------|-------------------------------------|------------------|
| RuMoO <sub>x</sub> /NC-5                                 | -39              | 28.3                                | <b>This work</b> |
| Ru/NC-400                                                | -39              | 40                                  | 1                |
| a-RuTe <sub>2</sub> PNRs                                 | -41              | 36                                  | 2                |
| Ru-MoS <sub>2</sub> /CC                                  | -41              | 114                                 | 3                |
| Pd <sub>3</sub> Ru/C                                     | -42              | /                                   | 4                |
| MoP-Ru <sub>2</sub> P/NPC                                | -47              | 36.93                               | 5                |
| Ru <sub>2</sub> P@PNC/CC-900                             | -50.7            | 28                                  | 6                |
| Ru <sub>1</sub> CoP/CDs-1000                             | -51              | 73.4                                | 7                |
| RuP <sub>2</sub> @NPC                                    | -52              | 69                                  | 8                |
| Ru/C-H <sub>2</sub> O/CH <sub>3</sub> CH <sub>2</sub> OH | -53              | 47                                  | 9                |
| Ni <sub>5</sub> P <sub>4</sub> -Ru                       | -54              | 56.7                                | 10               |
| Sr <sub>2</sub> RuO <sub>4</sub>                         | -61              | 51                                  | 11               |
| Ru-Co <sub>2</sub> P/N-C/NF                              | -65              | 65                                  | 12               |
| RuNC-2                                                   | -81              | 88                                  | 13               |
| S-RuP@NPSC                                               | -92              | 90.23                               | 14               |

**Table S8.** Comparison of charge transfer resistance ( $R_{ct}$ ,  $\Omega$ ) for the catalysts at various overpotentials.

| Sample       | RuMoO <sub>x</sub> /NC-1 | RuMoO <sub>x</sub> /NC-2 | RuMoO <sub>x</sub> /NC-3 | RuMoO <sub>x</sub> /NC-4 | RuMoO <sub>x</sub> /NC-5 | Ru/NC |
|--------------|--------------------------|--------------------------|--------------------------|--------------------------|--------------------------|-------|
| $\eta_{20}$  | 115.7                    | 119.0                    | 105.5                    | 140.6                    | 52.4                     | 132.8 |
| $\eta_{50}$  | 43.2                     | 44.1                     | 39.4                     | 46.3                     | 23.5                     | 45.6  |
| $\eta_{100}$ | 21.2                     | 23.7                     | 20.6                     | 21.5                     | 14.5                     | 24.1  |

## References

1. M. M. Lao, G. Q. Zhao, P. Li, T. Y. Ma, Y. Z. Jiang, H. G. Pan, S. X. Dou and W. P. Sun, *Adv. Funct. Mater.*, 2021, **31**, 2100698
2. J. Wang, L. L. Han, B. L. Huang, Q. Shao, H. L. L. Xin and X. Q. Huang, *Nat. Commun.*, 2019, **10**, 5692.
3. D. W. Wang, Q. Li, C. Han, Z. C. Xing and X. R. Yang, *Appl Catal B: Environ*, 2019, **249**, 91-97.
4. X. P. Qin, L. L. Zhang, G. L. Xu, S. Q. Zhu, Q. Wang, M. Gu, X. Y. Zhang, C. J. Sun, P. B. Balbuena, K. Amine and M. H. Shao, *ACS Catal.*, 2019, **9**, 9614-9621.
5. Y. X. Gao, Z. Chen, Y. Zhao, W. L. Yu, X. L. Jiang, M. S. He, Z. J. Li, T. Y. Ma, Z. X. Wu and L. Wang, *Appl Catal B: Environ*, 2022, **303**, 120879.
6. T. T. Liu, B. M. Feng, X. J. Wu, Y. L. Niu, W. H. Hu and C. M. Li, *ACS Appl. Energy Mater.*, 2018, **1**, 3143-+.
7. H. Q. Song, M. Wu, Z. Y. Tang, J. S. Tse, B. Yang and S. Y. Lu, *Angew. Chem. Int. Ed.*, 2021, **60**, 7234-7244.
8. Z. H. Pu, I. S. Amiin, Z. K. Kou, W. Q. Li and S. C. Mu, *Angew Chem Int Edit*, 2017, **56**, 11559-11564.
9. Y. Z. Li, J. Abbott, Y. C. Sun, J. M. Sun, Y. C. Du, X. J. Han, G. Wu and P. Xu, *Appl Catal B: Environ*, 2019, **258**, 117952.
10. Q. He, D. Tian, H. L. Jiang, D. F. Cao, S. Q. Wei, D. B. Liu, P. Song, Y. Lin and L. Song, *Adv. Mater.*, 2020, **32**, 1906972.
11. Y. L. Zhu, H. A. Tahini, Z. W. Hu, J. Dai, Y. B. Chen, H. N. Sun, W. Zhou, M. L. Liu, S. C. Smith, H. T. Wang and Z. P. Shao, *Nat. Commun.*, 2019, **10**, 149.
12. Y. Xu, T. L. Ren, K. L. Ren, S. S. Yu, M. Y. Liu, Z. Q. Wang, X. N. Li, L. Wang and H. J. Wang, *Chem Eng J*, 2021, **408**, 127308.
13. Y. T. Li, F. Q. Chu, Y. Liu, Y. Kong, Y. X. Tao, Y. X. Li and Y. Qin, *Chem Commun*, 2018, **54**, 13076-13079.
14. X. Y. Liu, F. Liu, J. Y. Yu, G. W. Xiong, L. L. Zhao, Y. H. Sang, S. W. Zuo, J. Zhang, H. Liu and W. J. Zhou, *Adv Sci*, 2020, **7**, 2001528.
